# Supplementary material for: Dual organism design cycle reveals small subunit substitutions that improve [NiFe] hydrogenase hydrogen evolution
Source: PubMed Central journal article supplement (PMC3701524; doi:10.1186/1754-1611-7-17), 2013-07-02

## Supporting Information

**Table S1**, Specific activities of enzyme preparations

| <i>E. coli</i>                                |                                                                        |
|-----------------------------------------------|------------------------------------------------------------------------|
| <b>pIY003 (WT)</b>                            |                                                                        |
| Evolution specific activity                   | 0.91±0.10 nmH <sub>2</sub> min <sup>-1</sup> (mg lysate) <sup>-1</sup> |
| Uptake specific activity                      | 4.8±0.6 nmH <sub>2</sub> min <sup>-1</sup> (mg lysate) <sup>-1</sup>   |
| Relative activity after 85 °C, 1h             | 41% (std. err. 39-45%)*                                                |
| Relative activity in 1% O <sub>2</sub>        | 29% (std. err. 21-35%)*                                                |
| <b>pIY004 (H230C)</b>                         |                                                                        |
| Evolution specific activity                   | 0.50±0.05 nmH <sub>2</sub> min <sup>-1</sup> (mg lysate) <sup>-1</sup> |
| Uptake specific activity                      | 9.2±2.9 nmH <sub>2</sub> min <sup>-1</sup> (mg lysate) <sup>-1</sup>   |
| <b>pIY006(P285C)</b>                          |                                                                        |
| Evolution specific activity                   | 0.35±0.04 nmH <sub>2</sub> min <sup>-1</sup> (mg lysate) <sup>-1</sup> |
| Uptake specific activity                      | 7.7±1.2 nmH <sub>2</sub> min <sup>-1</sup> (mg lysate) <sup>-1</sup>   |
| <b>pIY007(H230C/P285C)</b>                    |                                                                        |
| Evolution specific activity                   | 3.3±0.4 nmH <sub>2</sub> min <sup>-1</sup> (mg lysate) <sup>-1</sup>   |
| Uptake specific activity                      | 5.9±2.4 nmH <sub>2</sub> min <sup>-1</sup> (mg lysate) <sup>-1</sup>   |
| Relative activity after 85 °C, 1h             | 27% (std. err. 17-35%)*                                                |
| Relative activity in ~1% O <sub>2</sub>       | 37% (std. err. 23-48%)*                                                |
| Specific activity relative to pIY003          | 3.7±0.6                                                                |
| <b>pIY033(WT)</b>                             |                                                                        |
| Evolution specific activity                   | 1.6±0.3 nmH <sub>2</sub> min <sup>-1</sup> (mg lysate) <sup>-1</sup>   |
| <b>pIY038(H230C/P285C)</b>                    |                                                                        |
| Evolution specific activity                   | 3.8±0.5 nmH <sub>2</sub> min <sup>-1</sup> (mg lysate) <sup>-1</sup>   |
| Specific activity relative to pIY033          | 2.3±0.8                                                                |
| <b>pRC41-4(WT)</b>                            |                                                                        |
| Evolution specific activity                   | 9.1 nmH <sub>2</sub> min <sup>-1</sup> (mg lysate) <sup>-1</sup>       |
| <b>pCM012(H230C/P285C)</b>                    |                                                                        |
| Evolution specific activity                   | 19 nmH <sub>2</sub> min <sup>-1</sup> (mg lysate) <sup>-1</sup>        |
| <b>pIY085(WT, strep-tagged)</b>               |                                                                        |
| Evolution specific activity, unpurified       | 6.1 nmH <sub>2</sub> min <sup>-1</sup> (mg lysate) <sup>-1</sup>       |
| Evolution specific activity, purified         | 690 nmH <sub>2</sub> min <sup>-1</sup> (mg protein) <sup>-1</sup>      |
| <b>pIY086(H230C/P285C, strep-tagged)</b>      |                                                                        |
| Evolution specific activity, unpurified       | 12.7 nmH <sub>2</sub> min <sup>-1</sup> (mg lysate) <sup>-1</sup>      |
| Evolution specific activity, purified         | 2200 nmH <sub>2</sub> min <sup>-1</sup> (mg protein) <sup>-1</sup>     |
| Purified specific activity relative to pIY085 | 3.2                                                                    |
| <i>S. elongatus</i>                           |                                                                        |
| <b>pRC41-4(WT)</b>                            |                                                                        |
| Evolution specific activity                   | 0.10±0.01 nmH <sub>2</sub> min <sup>-1</sup> (mg lysate) <sup>-1</sup> |
| <b>pCM012(H230C/P285C)</b>                    |                                                                        |
| Evolution specific activity                   | 0.54±.06 nmH <sub>2</sub> min <sup>-1</sup> (mg lysate) <sup>-1</sup>  |
| Specific activity relative to pRC41-4         | 5.1±0.7                                                                |

\*geometric standard error

**Table S2, Primers used in this study**

| <b>Name</b>             | <b>Sequence</b>                                                     | <b>Purpose</b>                                                                                                 |
|-------------------------|---------------------------------------------------------------------|----------------------------------------------------------------------------------------------------------------|
| <b>AMR3-2</b>           | <b>CAATTTACACAGGAAACAGACCATGGATG</b><br>GCTTCCATTATTGGTAGC          | Forward primer for amplification of hydrogenase operon starting at orf2 (light); overlaps with pTRC-NS1 (bold) |
| <b>AMR-44</b>           | <b>TGCATGCCTGCAGGTCGACTCTAGAGGATC</b><br>TCAGCAGATCCTTGGGAAGC       | Reverse primer for amplification of hydrogenase operon ending at hypE (light); overlaps with pTRC-NS1(bold)    |
| <b>IY002HopMidF</b>     | CCAGGCTACTCGAAGAAACG                                                | Forward primer in the middle of hydrogenase operon                                                             |
| <b>IY003HopMidR</b>     | GCGCACGTATCGTTTCTTCG                                                | Reverse primer in the middle of the hydrogenase operon                                                         |
| <b>IY004HydSH238CF</b>  | TGACAGATGTTATCGACGCC                                                | Forward primer to generate H230C                                                                               |
| <b>IY005HydSH238CR</b>  | GGGCGTCGATAACATCTGT <b>CACAGATGCTT</b><br>TCACCAAAAAAG              | Reverse primer to generate H230C mutation (bold)                                                               |
| <b>IY010pDEST24F</b>    | GGCTGCTGCCACCGCTGAGC                                                | Forward primer to amplify pDEST backbone                                                                       |
| <b>IY011pDEST24R</b>    | CTATAGTGAGTCGTATTAATTTTCGCGGG                                       | Reverse primer to amplify pDEST backbone                                                                       |
| <b>IY012HydT7CBAF</b>   | <b>CCCGCAAATTAATACGACTCACTATAGGG</b><br>AAACAGACCATGGATGGC          | Forward primer to amplify hydrogenase operon for insertion into pDEST24; overlaps with IY011pDEST24R (bold)    |
| <b>IY013HydT7CBAR</b>   | <b>GCTCAGCGGTGGCAGCAGCCAGGATCTCAG</b><br>CAGATCCTTGG                | Reverse primer to amplify hydrogenase operon for insertion into pDEST24; overlaps with IY010pDEST24F (bold)    |
| <b>IY014pDEST24F</b>    | CCCGCAAATTAATACGACTCACTATAG                                         | Forward primer to amplify hydrogenase operon out of pDEST24 plasmid                                            |
| <b>IY015pDEST24R</b>    | CTCGGAGCACTGTCCGACCGC                                               | Reverse primer to amplify hydrogenase operon out of pDEST24 plasmid                                            |
| <b>IY016NS1pDEST24F</b> | <b>GCGGTCCGACAGTGCTCCGAGCGAGCTTCT</b><br>GGAGCAGGAAG                | Forward primer to amplify pTRC-NS1 for insertion of T7-driven hydrogenase; overlaps with IY015pDEST24R(bold)   |
| <b>IY017NS1pDEST24R</b> | <b>CTATAGTGAGTCGTATTAATTTTCGCGGGCC</b><br>GATCCTCTAGTATGCTTGTAACC   | Reverse primer to amplify pTRC-NS1 for insertion of T7-driven hydrogenase; overlaps with IY014pDEST24F(bold)   |
| <b>IY018HydSP293CF</b>  | ATCGAATCTGGCCATCCGTGT                                               | Forward primer to generate P285C                                                                               |
| <b>IY019HydSP293CR</b>  | ACACGGATGGCCAGATTCGAT <b>ACAAAACT</b><br>CGTGCCTTG                  | Reverse primer to generate P285C mutation (bold)                                                               |
| <b>IY170HynSF</b>       | GTATTATTGCCATCGGTACC                                                | Forward primer upstream of BamHI site to transfer mutants                                                      |
| <b>IY171HynSR</b>       | CGAGTGATAGGATCGACGAC                                                | Reverse primer downstream of AgeI site to transfer mutants                                                     |
| <b>AN000StrepF</b>      | CGTAGCGCTTGGTCCCACCCGAGTTCGAA<br><b>AAATAAGATAATAGGCAAGGCTCATGG</b> | Forward primer encoding the HynS C-terminal strep-tag; overlaps with hynS-hynL intergenic region (bold)        |
| <b>AN001StrepR</b>      | TTTTTCGAAGTGGGTTGGGACCAAGCGCT<br>ACGTGAGTTTTT <b>CCAGCATGCTTC</b>   | Reverse primer encoding the HynS C-terminal strep-tag; overlaps with the c-terminus of hynS (bold)             |

**Table S3 (22pp)**, Maps and sequences for vectors used in this study

Map Key:

Green – replication origins, transfer origins, transcriptional promoters

oriV – vegetative origin from p15

oriT – RP4 conjugation transfer origin

PTRC – P<sub>TRC</sub> promoter (includes lacO repressor element)

PT7 – P<sub>T7</sub> promoter

lacO – lacO repressor element

Red – transcriptional terminators, mutations

T4t – T4 terminator

rrnBt – rrnB terminator

Grey – upstream and downstream NS1 homology regions for transfer into *S. elongatus*

Yellow – ORFs









GGTCAAAGTTGGCGACTATGTAGTGTACATGTTGGTTATGCTCTCAAAGTATCACCTATGATGAAGCGAGGTGACATGGGAGATGCTCGATCAGGTCATTGCTTACGATGCATGAATAGTCTTTGCTAGTACTGCTTCCACGACGAGCA  
AACATGAATTAAGTCTGTCAAGCTCGTTACTTGCAAATCGCGCCACTGTCAAGTGTGAGCCGACTTGTGCACCATGGTTCCTGGTAAAGTGGCGCAAGTACACCATTTGGCGATCAGGCAACGCTTAGAATGTACACAGGCGTATCAAGATACGCTGTAATTTGTGG  
CGAATTCAGCCGAGTTTCGGTGAATAGCATCTATGTGCAAGTTCGGTGTGCTGGCAAAACGACTCATTGAGGCGCATGAATTTATATGCAACGAATAGAGTTTATCGCACCTGACCAATTTACAGAATCAAAGGAGAGAAACATGCGGTAACTGGTGGAA  
ACCGAAATAAATCAGAGAAAACGCAAGCAATCAGCAAAATCGTTGAGGTTCAAGCAAAATTTAAAAAGCAAAATGCAACCAAGCAAGTACCAACCGTCTTATTTGACGACACATAATGCTACTAGTGAATTTTATGATGCTACCCAGGCGTGGAAAAACAG  
GCTACTCGAAGAAACACTAGCTGGCTTAAAGTCCGAATCAGCAAGTGGCGTATTGAAGCGACTCGAAACTGAAATGACGCAATAGAATAGACGCTAGTGGTGTGAGGCGGAGCAATGCGCACGGCCAGGTTGCTTGGACGCCAGTATGTGCAAAAG  
TACTTGAAGATTTAGCTTACAAAACAGACTGTTTGGTTATAGAGAAATTTGGCAATTTGATTTGCGAGCGTGTGGTATTAGGACGACTTAAACATTTATTTGCTGCTCGTACCAGAAGGTGATGAAGCTGAAAAGTACCAGTATGTTTCTGCGCCG  
GAGCTGACTGTTATTTAAAGTCTTCAAGTGTGCAATTCAGATGAATTTCAATGACTCCGCGGATGAATCTTGGTAAAGTGGCGCAAGTACAGTGTGCTTCAATGAAAAGTCAACATAGAGCTGTGGTTTTCTTATTTACGACGCCAT  
TACAGCTCATCAGTCTCAGTCTGTTACAAAATAGCGGAGTCAAAGTCTTATGTACAGTGTGAATCGTGTCAAGGACATTAAGAATACCTCGCTTCAAACCGTTCGTATCTTAAATGTTGCGGTGCCATGAGCTGCGATTACGCGCGCTGGATTAAGAGT  
TGTTCAGCACAATTTCACTGTACTGACTGGGCAAGGTCGCCGTTTGTATTGCCCCGAAGAGGATTTGCATACGCGATACCTTAGCCATTAACGAAAATGTCGTTATCGTTAGTTTGGTGACATGCTCCGCGTCCGAGTGAACGAAATGGTGGCTGAGC  
TCATTGATAGACGCAAAAATCAAGGGCCGATATCCGTCGATATCTTCTCAAGAAGCGGTATCTATAGCATTGGAAGAACCCTGTAAGGTTATTGTTGTTTTGCTGTTGGTTTTGAAACGACTATGGCCAGGTTGCGACCAACCTGCTAAATGATTACCCAA  
TAACTTTAAAGTATTATGCTGGACGACTTACTTGGCCAGCAGTGGCCATGTCTTGAAGTCAACCGAATACTTTTGATGCTGATGGCCAGGCCAGTTGCGCAAAATATGGGTAGTGAAGAATGGCAGTTTGAATCGACCATATAATTTGCGTGCATGA  
TTGCTGGTTTTCACTCAGAAAGTTGCTGTTGCTGCTCAAAGCTGCTCGGTAATTTGCAAAATAAGTCTGACACTGAGTAAACCCTATCCGAAAGTGGTAAGCAAAACCGCAATGACGAGCTAAAGCAATAATCAATAAGCGTCTACTCTGTCGACACAT  
TGGCCAGGAATGGTGTATTCTCGTTCGAAATTTCTTCTGAGACTTGCACCTAGACGCGCAACAACGATTTAGCGCAGTCAATTCCTTCCGAATGTGCGCAAAAGCTTCTGAAACCACTCGCCCTGGTAAAAAGTATCTCGAAAAATGGCAC  
TGATGCTGCGCTTTTTGCTCAGGAATGCAAAACAGCAGTCCCTAAAGGCGATATGTTGCTGATGAGGGGGCTTGCAGAAATTTGGTATAGCTCTGGTGAAGCTGATAAACAAATGTTATCAAAAAGGGGAATACGCTAAAGGTGGAGATGAAGTATGACAA  
TGCCCGCACATATGTTGCAATACGAATAAGAGTAAAACATCGCCTATGAGTTGAACACTTGGAGTCACTCAGGGGGTGGGTTCAGACCTTAACTTACTGCTTAGCGTATGAAAAGATTTGTTGGTGGTACAAAACGACTGTGGATGTGTGCGAATACAG  
CTGAAGGCACTGAGCTAGACTGTTGAACAATTTGTTGCTACTGAAACAATGGTTCGCTATCTTCTGTAAGAAAAGAGGATTAACCTGAGTAATGAGACTGTTTACGATAAAAGAAAGCGGCTATGATATAGCGTGGGGGCGATTAATCAATCCC  
AAAGATGCTAATTTGTTGGAGCGTGAAGCTGAGTACTGCTCAATAACTAACGACGTCGACCTAATAGCTTATCGCTTGCAGTAAATGGTGGCCAGCAATTTCTATGCTGGGCAATGCCATACGACGAAAGAACATGAGTATGTGACGATTTCAAATGTGTA  
GTTATGTGCTAAAGAAATCAATCGCAACTGATAGGCGCTTTCATGCTCAACCAATAAGCTGTGCGGTATGCGGGCTGAAGTATTTGTTCAACTGTGCGGCGCGCTGGTCTCGCAAGGCGATGTGATGTTGTAGCAACGGTTGCTCGGTATTTGAATCAAGGCA  
AAATTTGCGGCTAAAAGATAGGCGGTTACTACTTGTCTGTGACGCAACAAGCACTGAAGCGTGAAGCTTTTACGCGCAGCTAAAATAAGACAGATAAACCTTTCCGGCTCATGCTCCAGAGCTCTGTGCGACGAAACAAGTGAAGGATGGTAGATAAATG  
GTTGCTGTAGACAGTCAATAAGAGCGCTCTTAAAGCCCGTGGCACCTTTTACTTGAAAAAGCACTGAAGTACCTTTCAGATAGATAACGAGCCCTGCTTCTGATTTGGGGTGTGTTGCTGCGACGCGGAGTCAATTTACTATTAGCAGCAAT  
CAATCGCCCATGTTGGTACGTCAGGAAATATTACGGTGAACCGATGGTCACTGACGCTCATCGGCAACGCAACCTTTCGATGTTGGCAGACTTCTGTCGACCAATAATCGAGACTTTTCAACAATGGATGATCTGTGCTGGCAAGCTTAAAGTCAAGCA  
CCATTCCAATCGCTGGGGGGGATAAGTCCGATAGAATATCATTGCCATATAGTGTGAGGAAACCAATGCTGCTGTTGGCGCAATCAGAAAAATACAGTGCATAAGCTTGAACAATCGACTATGCTAACCCGCATATGGCGACTCGATTCTCGGATA  
ATGCAAGCGCACTTTGAAAAATGATCAGTGACTTTCAAGCTCTTATCATGTTCTCACAGCGTATTCTTTCGATAGCACTTCCGCTATATCAGTCCCGTTGGCCAAAGGCGAGTCAACGACTCAAAAGTTTACATCACCCGCTCATGATCAGCGT  
GGCATAGCTGCTGAAATTCGACACCAAGCTTGGTTTTGCTGTTGGGATGGAACGGGATAGGCGAGAATGGCGAGATGGGGAGGGGAAGTTTTTGGGGAGCCCGGCAATGGAACGTTGTGCTCATTAGCGCTTGAAGTGAAGGCGCAACAGGTT  
CAAACTCAACCATGGGAAAGTGCAGCTCACTAGTGTGGGACTAAATTTCCCGCATTTGATTTAAACCTTTGATCGCAACAATAAGCTAACCAAGTGAACGCAATGCAAAACGAACTCAATTTGATGTTAGTGGTCAATGGGAAGACTGTTGCAAGCGGCGCATTTGCC  
TGTGTAACGAGCGAAGTCTCTTATGAAGGGCAGGCGCGATGATGTTGGAAGGCTTGTGCTGACGCGCTTAAAGTTATGCTTAACTGGTTCGAGAAAACGACGAATTTAATCAAATGGATGGCGAACAATGGTCCGGAATTTGATTTCAAAGTGT  
TCCCAAACCTGCTGCAAAATTTCCAGCTCTGTTAATGAAAGGATGGGAGTAAACCACATTTGCGGTAAGAAAGTTAATTTGACCACTATGGATGGCAGGAGGCGCTTCCAAAATCGCAATTTGTGTGAGCGTATATCAACAGGTTTTTACAATCAGACA  
TTCCTGTTGTTATTTCAAAGTATTGCTCAATTAACGATGCGCAATAAAGTGTGGGCAATCCAGGAATCTGTTACGAGGAGTCAATGAAAAAGCGAGGCGCAATAATCAATCATCATCAGAGCGTGGGCGGAACTTATCAATAGCTCAGGGAACCGGCG  
GAACACTGACAAAAGACTCATGATCATGTTTTAAAAATAAAGCAACAAGATCAAGTGTCTCATGATGCGCCAGCAAGTAACTTTGATGGTCTTATCTGAGTATAACACCGGATAGCTTGTGTTGATCCCCCGCAATTTCCAGCGCGCAATGAGGCGCG  
TTGAGTGTACGTTACGTTCAATGTTAGCAGTCTTGGGGCAACACCGGTACACTGACTGCAATTTATTAAGAAGGCTTTCCCTTTCAACATGAAAACAAATGTTAAAGAAAGTGCATCAAGCTGCCGAAAGAACGAGGTGCCATTGTAACAGGTGA  
TACGAAAGTGTCCGAAAGGCGAGTGGTGGCGGCTTTTTCAATAACAAGGGTGTGGAGCAGCGAGATGCGCGGATTTGGGATACAGCTTATAAAGGCAAGGCTCATGATCTGTTAGTGGTCTGATAGGTGATCAGGTTGCTGTCTGCTGCTCGCG  
AGGACTATGGTTGCAAGGTGACGTAAGCTGATTTGTTGGAAGGCTGTTCTCTTATGATCCAATCAAGCTTTGGAAGGTTGCTGTTTTGTGCGTGAACCACTCTGGAGGGTGTGCAATTAACCTGACGTTGCTAATGAAACAGGCTTGCATACGAGTTA  
ATTTAAAAATAATTTCCGGTGCAGCTGAAGTGGCAAGCGTGTGAAATATTAGGCTTTGATCCGTTTGTATTAGGCTGTGAGGGAGCAGTGTGCTGTTGTTGCCCTGACATAAGCGGTAAGGTGCTAGAACCTGGCGGAGCATGAAAACGGGAGCAGGCGGA  
ACACATTTGGTAAATAGTAAAAACACCGAATCAAAGGGCGGCTGAACTTTGTTACGCGCAATGGGAGGAGACGTTTCAATGAATGAACCTGGAAGTGAAGGCTTCAAGGATCTGCTGAGATCTCTAGAGTGCATGACGATGCAAGCTTGGTGTTTTGGCGG  
ATGAGAGAAAGTTTTCAGCGTATACAGATAAATCAGAACGAGAAAGCGGCTGATGAAACAGAAATTTGCTGCGGCGAGTACGCGGCTGCTCCACTCAGCCATGCGGAACTCAGAAGTGAAGCGGCTAGCGCGGATGGTAGTGGGGTCTCCCAATGCGAGAG  
TAGGGAACGTCAGGCTCAAAATAAACGAAAGGCTCAGTGAAGACTGGGCTTTTCTGTTTATCTGTTGTTGCTGGTGAAGCTCTCTGAGTAGGACAAATCCGCGGGAGCGGATTTGAAGCTTGCAGAACGCGGCGGAGGTTGGCGGAGCAAGCGCCCGC  
ATAAATGCAAGGATCAAAATGAAGAGAAAGGCTACTGACGGATGGCTTTTGGTCTTCAACAACCTTTGTTTATTTTCAAAATACATCAAATATGATCCGCTCATGGCGGCGCAGATCCCGGCTACGAGCTGAATTTGAGCTTGGAGCAGGAAG  
ATGTCGGCGGACTAGCAGCAGCGGCTGCAAGCGCTCCGCGCGCTTGGTCCCTTCCGCTGAGCTTTTCACTTTCGACGATACGGGCGGCGCCCGCGCTTCCGCGATGCGCGTTTACAAGCTGCTCAGCTGGGCGATCAGATCGGTTGAAGTGTGCT  
CTGCACTGTTGATCCGCTCTGCTGCAAGGAGGTTCTGCTTGGCTAGCAGCGACTTGGTAGCAATGCTGCTTCACTGCTGGCCACCACTGCTGCGGCGGCTCAACGCTCTGAAATCCGCGCTCGGCTCGGCTGGGCGATCGCTACATCGCGATGATCT  
GACGCGAGGCGGATGCTTGTCTTTCCGCGCTTGGATGCGAGAGGCGAGCTGGGACTGGCTTCAAGCAATCGGGCATCTGCTGCGAGACTCAGCCGCTGCTGCTGCTCAGTACGAGGAGATAAGCCAGCTATCGGAAATGTTGGAATGCGAGCTGCAAGG  
ACTAGACCCAGCTGCTCAAGTCTATCCGCGCTTCCAGCAGACTTTGGCAAGGCAATTTGCTCTGTTGATCTGCTCCGCGGTGAGGCTGGCTGACTAAAACACCAAGGAGTGGCTTCCAGGGTCTCTTGGCAATTTGCTCGATTTCTTACGTTTGTTCGCAAG  
CAGCGCTGATGCTGCTGTTGATGTTGGTGGTGGTCTTCCCAAGCAATCTGATATTGGCAAGCGCTTCAACAGTCAAGGGAATGCGGCTTGGAGAGGACTTGAAGCGGCAACTCAATGATCATGTTGGTGAATCAATGCGGAGGCTTTTCCAGCAGAGTACCC  
GCAAGGCTGCTGCGCGCTTGGCAAGGATAGCAACTCGGCGGCTCACTACTGCGGCGACTGCGCAGCAAGATCAAAATTTCACTGGTGGTGGCAGATGATGAGAGATGGCGAGGACTAAGCTGCGCCGCGGACTCACAGTCAAGAAAAGCATCTTA  
CGGATGGATGACAGTAAAGAAATATGCAAGTGGCTGCTAATCACTGATGATAAAGTGGCGCAACTTACTTCTGCAAGCACTGGAGGCAAGGAGGCTAAACGCTTTTGGCAACATGGGGGATCATGTAACCTGCTGCTTGGGAGCCGAGCTGAAAT  
GAAGCCATAACCAAGCAGGAGTGAACCAAGGCTGCGCAATGGCAACGAGTGGCAAACTTAACTGGCGAATCTTACTGCTTCCGCGCAACATTAATAGACTGGATGGAGCGGATAAAGTGGAGGCAACTTCTGCGCTCGGCTTCCGCG  
TGCTGGTTTATGCTGATAAATCTGAGCGGCTGAGCTGGTCTGCGGATCATTTGAGCAGCACTGGGGCAGTGGTAAAGCTTCCGATGATGATGATCTACAGCAGGCGGAGTCAAGCAACTTGGATGAACGAAATAGACAGATGCTGAGATAGTGGCTCAC  
TGATTAAGCATGGTAACTGTCAGCAAGTTTACTCATATACTTATGATGATTTAAACTCATTTTTAAATTTAAAGGATCTAGGTGAAGTCTTTTGTGATTAATCTAGTACCAAAATCCCTTAACTGAGTGTGTTGCTTCCACTGAGCGTCAAGCCCGTAGAA  
AAGTCAAAGGATCTT













TCTAAAGTTCTGTAACCTACTTGAGGAATATTAGAAATCAAAAATAGATTAGAAAGTCAGTACTTCTTAATTGCCTTTTTACCTGGTGGTAGGTTACCCCGTTAGTTATGCGCACCCGGGTCTCAAGGCGATTCACTACTTTTTGGGATCGTGGGT  
CAACAATGGTGTCTGCACCGTGTGGCTGTTTATTTATCGAGCTAGAGCAAGTAGGCCCTATCAACGGGTAAACAGTAATGTGTCTCGCATCCCATGAAGTCAATTGAAATGAAAGCTTTAAACGCAAGTGTGAAGCGAAAGGTGTCTCGGAGGTTGATTTAC  
ATTTAGTGCAAGGGTAGAGGTCAAGTTGGCGACTATGTGATGTCATGTGGTTATGCTTCCAAGTGATCACCATGATGAAGCGCAGGTGACATGGGAGATGCTCGATCAGGTCACTTGTACGATGCTGAAATAGTCTTTGCTATAGCTGTGTCACACAGT  
CGCTGTTCCAGCGAGCAACATGAATAAGTCGTCAGTGTGTTCAAGTCAAGTGGCCCACTGTCAAGTGTGGGCTGACTTGTGTCACATGCTGTTCCCTGGCTGTGAAGTCAACCATTTGGGCTGTGAAGTCAACCATTTGGGATGACACAAAGCTATCAAG  
TACGCTGATAAATGTGTGGCAATTCAGCCGAGTTCCGTTGAATAGCATCTATGTCGAAGTTGGGGTCTGGCAAAACGACCTCATTGAGGGCGATGAATTTAATGCAACGAATAGAGTTTATGCACTGCAATTTTACGAATCAAGAGGAAACAAATGTTG  
CGTAAGTGTGGTGGCAAAACGAAGTAAATCAGAGAAAACGCAAGCCATCAGCAAAATCTGTTGAGGTTCAAGCAAAATTTAAAGCAACAATGCAACCAAGCGATAGCAAAACGCTGCTTATTTGACGCACATAATGTACTAGTGATTAATTTGATGTATCCC  
CAGGCAAGTGGAAAAACAGGCTACTCGAAAGAACGATAGCTGGCTTAAAGTGCATAACGAGTGGGCGGTGATTTGAAGGCCACTGAAACGTAAATGACGCAAAATAGAAATAGACGTCATGGTGTGCGAGCGGAGCAATCGCCACGGCCCAAGGTTCACTTTGGC  
CCAGATGTTGGTCAAAAAGTACTTGGGAATTTAGCTTACAAAACAGTAGAGCTTTTGTATATAGAGAATGTGGCAATTTGATTTGTCAGCGTGTGTTGATTTAGGCAAGCATTAAACATTTATTTGCTCCGACAGAAAGTATGATTAAGCTGAAAGTACC  
AGTGATGTTCTCGTCCGCGGACGCTCATGCTTATTTTAAAGCCGATTTACTTGAATTTCAAGTGAATTTCAATGTACTCTGGCGGATTTGAATCATTTGTAAGTGGGCAACGATGGCGCCGTTCTGAAAGTCAACATCTAGAGCGTTGGTTTT  
CTTATTTACGCACGCCATTACAGCTCATCAGTCTCAGTCTTACAAAATAGCGGAGTAAAAGTCTTATGTACAGTGTGTAATGTTGTCAAGACATTAAAGATACCTCGCTTCAAACCGTGTGATTCTTAATGTTTGGCGTGGCAGTGGGTGGATTCAG  
CGCTGATGATTAAGAAGTGTGTTTACGACAAATTTATCATGTACTTGGCCAGGGTCCCGTGTGATTTGGCCGCAAGAGGATTTGATACGCGGATACACTTAGCCATTAAAGAAATGCTGTTATGTTAGTTTGGTGACATGCTCCGCTCCCAAGTCAAGCA  
CGAAATGGTGGCTAGTCTCAATGATAGCAGCAAAAATCAAGGGCCGATACCGTCCGATATCTTCTCAAGAAAGCGTATCTATAGCATTTGGAAGAACCTGTAAGGTTATGTTTGTGCTGGTTTGGTAAACGACATGGCCAGCTATGGCAGCAC  
TGTCTAAGTATTAACCAAACTTTAAAGTATTATTTGTCGAGGACTTACTTTGGCAGCAGTTGGCCAGTGGCTTGAGAGTCAACGAATCTTTGATGACTGATTGCGCAGGCGACGTTGGCAAAATTTGGGAGTGAAGAATGGCAGTTTGAACGCACCT  
CATAAATGGCTGTCAGTATGCTGGTTTTTCAACGAAAGTTTGTGTGTCGCTCAAAACGCTGCTGGTAAATGTTTCAAATAAAGTGTGACTAGTAAACCGCTATCCGAAAGTGGTAAAGCAAAACGCAATGACAGCTAAAGCAATAATCAATAAAGCGTT  
CACATCTGTTGACGCACATTTGGCAGGAAATGGTGTATTTCTGGTTTTCTGGATTTCTTCTGCTTGAAGACTATCGACCTAGACGCCCAACAGATATGCGCCAGTCGATTTCTTCCGAAATGTCGCAAAAGTGGTGGCAGAAACGTTCTTGAACACACATGCCCTGTGAAAGTGA  
TCCTCGAAAAATGGACCTGATGCTGGCCGTTTTTGGTCAAGAAATGCAAAACGACGATCCCTAAAGCGCATGTATGGTGTGATGAGGGGGTTCGCGAATTTGGTATAGCTGGTGAGCGCTCGATAACAAATGTTATCAAAAAGGGAAATGCTGAAAGTGTG  
GAGTGAAGTGTAGCAACTGCCGACATATGTTGCAACAGAAATAGAGTAAATCACTCGCTATGAGTTGAACATTAAGTGAACATTAAGTGGTGTGATCAGCGGTTGGTTGAGCAGCTAGTAAAGTAAATGTTGGTGGTCAAAAACGACTGT  
GGATGTGTGCAATACAGCTGAAGGCATGAGCTAGACGTTGAACAATTTGATTTCAACTTACGAACATGGGTGCTGATTTTCAATCTTGTGCGAAAAAAGCAGGTTAAACTGAGTAAATGAGACTGTTACGATAAAGAAAGCGCTCATGATATAGCGTG  
CGGGCGATATCAATCCCAAAAGTGTCTATTTGTTGGAGCGTGAAGTCGAGTACTGCAAAATAACCGACCTGGCAGCTATAGCTTATGCTGTCGAGTAAATGTTGGTCCAGGATTTCTATGCTGGCAGGCAATACACGAGAAAGCAATGAGTATGT  
CAGCATTCCAAATGTGAGTATGTGTAAGAATATCAATGCCAATGATAGCGCTTTCATGCTCAACCAATAGCTGCTGCGATGCGGGCCCTGAAGTATTTTGTCAACTGTCGGCGGGCGGTGTTGATGTTGATGCAAGCGTTGTGTC  
GCATTTGAACTCAAGCAAAATGTTGGCTTAAAGTATAGGCGGTTATCACTGCTGCTGACGCAAAAGCACTGAAGCGGTAGACTTTTACGCGAGGCTAAATAGACAGATAAACCTTCCGCGTCACTCCCAAGCCCTGTCGAGCAAAACAAAGTGA  
GGATGTTGATAAATGCTGCTGATAGCAGTCAATCAAGCGCTCTACTAAGCCCGTGGCAGCCATTTACTGCAAAAAGCAATGATGATGACCTTGCAGATAACGTAGCGCCATGCTGCTGATTGGGGGTGATGTGCCGTGACGCGACTGCAAT  
TACTCATTATGCAAGCAATCAATCGCCCATGTTGGCTAGCTCAGGAAATATTACGGTGAACCGATGTTGATCGAGCTCATCGCCAGCAGCAACCCCTTGATGTTGGCAGACTCTTCTGTCACCAATAAGCAGACTTTTCAACAACCTGGATGATTTCTGTCG  
CGAACGCTTAAGTCAGGCACCAATCCAATTCGCTGGGGCGGGTAAAGTCCGATAGAAATATCATTTGCCATATCTGTCGAGGAACCAATGCTGCTGTTGGCGGAATCAGAAAAATACAGTCAAAATAGCTTGAACAATCGACTTATGTAACCCGCTATTTGG  
CGACTGATTCGGAATGCAAGGCATTTGAAAAATGATCAGTGACTTTCAAGCTCTCATATGTTCTCAACAGCGTATTTCTTGGCATAGCCATCTGGCTATATCAGTCCCGTTGGCCAAAGCGAGTGAACCTACGACTCAAAAGTTTTACATCAAC  
ACGCTCATGATCAGCTGGGCTAGCTGCTGAAATACGACCAAGCTTGGTTTTCTGTTGGGATGGAAGGGATAGCGGAAGTGGCAGATGTTGGGAGGGGGAAGTTTTTGTGGGACCCGGCAATGGAAAGCTGTGCTCATTAGCGCTTAGAAGTTG  
CAAGGGCCCAACAGTTTCCAATCAACATGGCGAAGTGCAGCTCACATAGTGTGGGTACAAATTTCAACGCGATTGATTTAAACCATTTGATCACAACAAATTAAGTCAACGCTATGGCAAAACGACTCAATGTGATGTTAATGGGAAAGCTGTT  
CGACGGCGGCTTGTGCTGTTGAACAGAGCGAAGTCTCTATGAAGGGCAGCGCATGATGTTGAAAGCGCTTGGCTGACCGCCCTCAAGGTTAGCTGTTAAGCTGTTGGTCCAGAAAAACGAGCAATTTATCCAATGGATGGCGAACCTGTGACGGAAC  
TATTTGATTTCAAGTGTCTCTCAACTCGTGTCAAAATTTCAAGCTTCTTAATGAAACGGATGGGAGTAAACCTCATTTGCGCTAAAAAAGTTTAAATTTGAACCAATTTGGATGGCAGGAGGCTCTCCAAAATCGATTTTGTGATGCGGATATACAA  
CGGTTTTACAATCAGACATTCCTGGTTTTTCAAGTAGTTTGGCATTAACGATGCCAATAAGTGTGGGCAATCCAGCAATGCTTACGAGGATCATAATGAAAGCGCAGAGGGCAATATCAATCATCAGAGCGTTGGGCGCGAATCTATTCAA  
TTAGCTCAGGGGAAACGGCGAACACGACAAAAGACTCATGATGATGTTTTAAAAATAAAGCGAAACAAAGTCTAGATGCTGCTCATGATGCGCCACAGTAACTTTGATGGTCTTATGATGATAAACAGGATAGCTTCTGTATCCCCCAACATTTCC  
AGCGGGCAATGAGCGGTTGAGTGTTCAGGTACCGTCAATGATTTAGCAGTCTGTGGGCAACACCAAGCTACATCAGTACTGATTTATTTAAAGAAAGGCTTTTCCCTTTCAACATTTGAAACAAATGTTAATGAAATGCACTCAAGCTGCCGAAGAACGAAAG  
TCGCCATTTGAACAGGTTGATCAAGAGTGTCCGAAAGGAGTGTGGCGGCGTTTTATCAATACAAGCGTGTGGAGACAGCGAGATGGCGGATTTGGGATACAGCTTTAAGAGCGAGGATCATGACTGCTTGTAGTGGTTCTGTAGGTGATCAGGTTGCG  
TGTGCTGCTGTGCTCGGAGGACTATGTTGCAAGGTCAGTAAAGTCTGATTTGGAAGCGTGTGCTCTTATTGATCAACTCAAGCATTTGGAAGTGGTTCGTTTTGTGGGTAACCACTCGTGGAGGTTGTCAGTATTACTCCATGACTGTTCTAATGAAAC  
AGGCTCGATATCGAGTAAATGAAATAAATTTCCGTCGACCTGAAGTGGCAAGCGTGTGGAATAATAGGCTTGTGCTGCTTGTTTAGCGGTGGAGGAGCAGTGTGCTGTGTTGCCCTGACATAAGCGTAAAGTGTGAGAACTGGCGGAGCTTC  
GAAACGGGAGCAGCGCAACATTTGGTGAATAGTAAAAAACACGAATCAAAAGGGCGGCTGACCTTTTACCGCAATGGGAGGAAAGGTTTTATGAATGAACCTGAAGTGAAGCCTTCCAAAGGCTGCTGAGATCCCTGCTTAAACGGTCTTGAAGGG  
TTTTTGTGTAAGGAGGAATATCCGATATCACAAGGAGGTTGGTGGCTATGCTGCTGATGCTGATGCTCAAGTGGCCTCAAGTGGCAGGAGGAGGACTGGCGCGCCGCAAGCGCTGGACAGTGTCTGAGCAGCTTTGGAGCAGGATGTCGCGGGC  
ATAGCAGCAGGCTGCGCAAGCTCCGCGAGCGTGGTCCCTTCGCTGAGCTTTTCATCTTCAAGATCAGCGGCGGCGCCCGCCGCTTCCGCGATCGCCGTTTAAAGCTGCTGAGCTGGGCGATGACATCGCTGGAAGTGTGCTGCACTGTT  
TGATCCGCTTCTGTCAGCAGGAGTTCTGCTTGGCTAGCAGCGACTTCGGTAGCAATGTCCTGTTCAGCTTCCGCCACACCGCTTCGCGCGCTCAAGCATCTGAATCCGCGCTCGGCTCGGCTGGGCGATCGCTACATCGCGATCCGCGAGCGGGCC  
GTGATCTGTCTTTCGCGGTTGGATGCGAGAGCGCCTGGGCTGCGCTTCAAGCAATTCGCGCATCTGCTGCAAGTCAAGCTGCTGCTGCAAGTCAAGCTGCTGCTGCAAGTCAAGCTGCTGCTGCAAGTCAAGCTGCTGCTGCAAGTCAAGCTGCTGCT  
CTGCTCAAGGTCATCTCCGCTCTTCCAGCAGACTTTTGGCAAGCAATTTTGTCTGTTGATGCTTCCGCGCTGAGGCTGGCTTAAACACACACAGCAAGTGGCTTCCAGGCGCTCTTGGCAATTTTCTGACTTTTTACGTTTTTTCGCAAGCGCCCTGCA  
TCGCTGTTGGATGCTGGTTTCTCCCAAGCACTTGTATTTGGCAAGCGCTTCAACAGTCAAGGGAATGCCCGCTTGGAGAGGCTTGAAGAAACGCGCAACTCAATGATCATGTTGTTGATGATCATGTCAGAGTCAATGGAGGCGCTTTTCCAGCAGAGTACC  
CCGCGCTTGAACAGCGATAGCCTCACTCGCGCCCATCACTACTGCGGCGACTTGCAGCAAGATCAAAATTTCACTGGTGGGAGTGTAGTAGAGATTGGCGAGGACTAAAGTGCAGCCCGGCGACTCCAGAGTCAAGAAAAAGCATCTTACGGATGGCATG  
ACAGTAAAGAAATATGTCAGTCTGCTCAATCAACCATGATGATAACACTGCGGCAACTACTTCTGACACAGTCAAGGAGCTAAAGGAGTAAACGCTTTTTTGGCAACATGGGGGATCATGTAACCTGCTTGAATGCTGGGAAACCGAGCTGAATGAAGCA  
TAACGAGCAGCTGACACACAGCTGCTGAGCAATGGCAAAACGCTTGGCAAACTTAACTGGCAGCAACTACTTACTGCTTCCGCGCAAACTAAATAGACTGGATGGAGGGGATAAAGTTGAGAGCACTCTGCGCTCGGCTCTGCGCTGGCTGCTGTTA  
TTGCTGATAAACTGTCAGGCGGTGAGTGGGTCTGCGGTATATGTCAGCACTGGGGCGAGTGGTAAAGCTCCCGTATGATGATATCACGAGGGGAGTCAAGCAACTGGATGAACGAATAGACAGATCGCTGAGTGGTCTGCTGATTAAGCAT  
TGGTAACTGTCAGCAAGTTACTCATATACTTTAGATGATTAAACTTCATTTTAATTTAAAGGATCTAGGTGAAGTCTTTTTGATAATCTCATGACCAAAATCCCTTAACTGAGTTTTCTGCTCAGTGGGCTGAGCCCGTAGAAAGATCAAGG  
ATCTTC

























**Figure S1,** A representative enzyme activity progress curve over four hours, using the doubly substituted enzyme expressed in BL21 $\Delta$ H<sub>4</sub> cells. Data points represent three technical replicates of an experiment conducted using the procedures described in the methods section. There is some deviation from linearity at 12h, likely due to consumption of reductive potential.

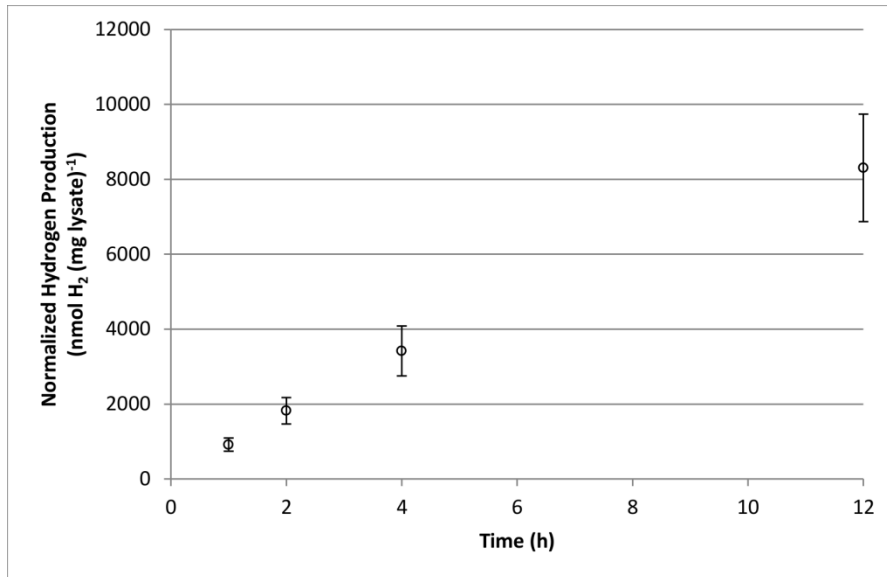

**Figure S2,** Specific activities of samples from western blot experiment (bars correspond to samples from gel lanes as found in main text Fig. 4)

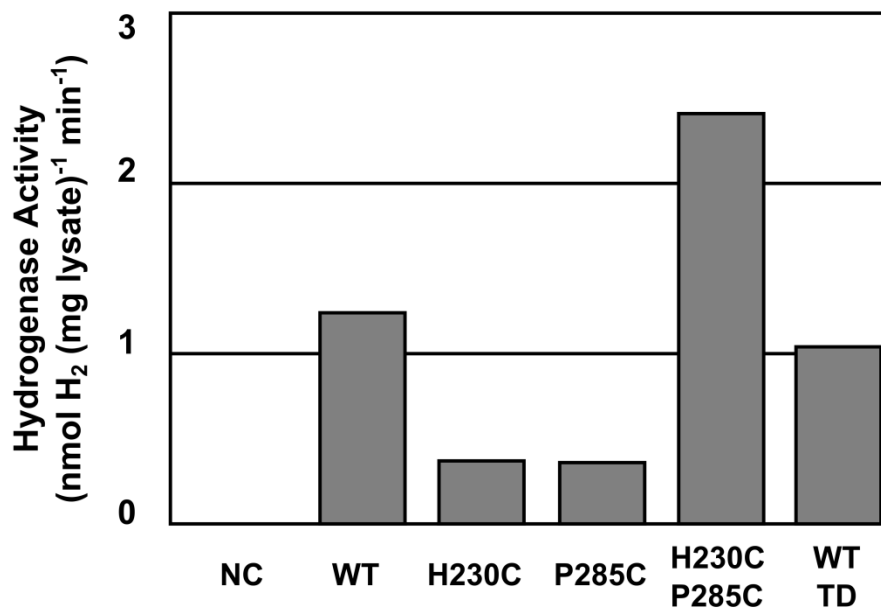

Supplement: 1754-1611-7-17-S1.pdf [file 1754-1611-7-17-S1.pdf]
